# Supplementary material
Source: publisher figshare collection journal article supplement (https://sage.figshare.com/ndownloader/files/33448276)
Supplement: Supplementary file 1 [file 33448276]

**Supplemental Table 1. Trial schedule**

| Schedule of assessments                                                                                       |             |                             |              |                    |                                                     |                                                    |
|---------------------------------------------------------------------------------------------------------------|-------------|-----------------------------|--------------|--------------------|-----------------------------------------------------|----------------------------------------------------|
| Visits                                                                                                        |             | 0                           | 1            | 2                  | 3                                                   | 4                                                  |
|                                                                                                               |             | Screening and randomization | Baseline     | Post-randomization | 7–10 Days or discharge                              | 90 Days                                            |
| Assessment                                                                                                    | Time window | Day 0                       | Day 0        | 24 ± 6 hours       | Day 7-10<br>(if discharge is earlier, at discharge) | Day 90<br>± 15 days                                |
|                                                                                                               | Method      | Clinical visit              | Intervention | Clinical visit     | Clinical visit                                      | Clinical visit or telephone interview <sup>8</sup> |
| Informed consent                                                                                              |             | x                           |              |                    | x <sup>1</sup>                                      | x <sup>1</sup>                                     |
| Medical history <sup>2</sup>                                                                                  |             | x                           |              |                    |                                                     |                                                    |
| Pregnancy test <sup>2</sup>                                                                                   |             | x                           |              |                    |                                                     |                                                    |
| Blood labs <sup>2</sup>                                                                                       |             | x                           |              |                    |                                                     |                                                    |
| NIHSS <sup>2</sup>                                                                                            |             | x                           |              | x                  | x                                                   | x <sup>3</sup>                                     |
| Pre-stroke mRS <sup>2,4</sup>                                                                                 |             | x                           |              |                    |                                                     |                                                    |
| Randomization                                                                                                 |             | x                           |              |                    |                                                     |                                                    |
| MRI or NCCT <sup>2</sup>                                                                                      |             | x                           |              | x                  |                                                     |                                                    |
| ASPECTS <sup>2,7</sup>                                                                                        |             | x                           |              |                    |                                                     |                                                    |
| MRA or CTA <sup>2</sup>                                                                                       |             | x <sup>5</sup>              |              | x <sup>5,6</sup>   |                                                     |                                                    |
| Catheter angiography <sup>2</sup>                                                                             |             |                             | x            |                    |                                                     |                                                    |
| Concomitant medications <sup>2</sup>                                                                          |             | x                           | x            | x                  | x                                                   | x                                                  |
| Concomitant procedure <sup>2</sup>                                                                            |             |                             | x            | x                  | x                                                   | x                                                  |
| Adverse events                                                                                                |             |                             | x            | x                  | x                                                   | x                                                  |
| Resource utilization                                                                                          |             |                             |              |                    | x                                                   | x                                                  |
| mRS                                                                                                           |             |                             |              |                    | x                                                   | x <sup>3</sup>                                     |
| EuroQol 5D-3L                                                                                                 |             |                             |              |                    |                                                     | x                                                  |
| <b>Optional: Applicable only to sites with DWI/PWI MRI or CT perfusion imaging as local standard of care:</b> |             |                             |              |                    |                                                     |                                                    |
| DWI/PWI MRI or CT perfusion <sup>2</sup>                                                                      |             | x                           |              | x                  |                                                     |                                                    |

1. Post-hoc consent if patient was not able to give consent at trial inclusion (according to nationally applicable law)
2. Routine examination for AIS patients
3. Assessment to be performed by an independent evaluator blinded to treatment assignment
4. Pre-stroke mRS assessment is completed by obtaining verification from an individual aware of the subject's functional status prior to stroke (e.g. family member, friend, etc.)
5. Imaging of head and neck is required
6. Recommended if standard of care or if an extracranial stent was placed
7. ASPECTS scoring has to be performed by a trained physician. The optional use of additional software e.g. RAPID is allowed
8. Clinical visit whenever possible, otherwise telephone interview

NIHSS, National Institutes of Health Stroke Scale; mRS, modified Rankin Scale; MRI, magnetic resonance imaging; NCCT, non-contrast computed tomography; ASPECTS, Alberta Stroke Program Early CT Score; MRA, magnetic resonance angiography; CTA, computed tomography angiography; DWI, diffusion-weighted imaging; PWI, perfusion-weighted imaging
